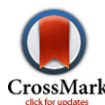

## Correction

# Correction: Biophysical Controls on Light Response of Net CO<sub>2</sub> Exchange in a Winter Wheat Field in the North China Plain

The PLOS ONE Staff

There are multiple errors in Table 7.  $NEE_r$  should appear as  $NEE_s$ .

Please see the corrected Table 7 here.

**Table 7. Comparisons of light response parameters and simulated NEE ( $NEE_s$ ) under sunny and cloudy sky conditions.**

| Items     |                                                        | Sky conditions | Average | Standard error | Difference (Cloudy-Sunny) | Total Standard error | Ratio (Cloudy/Sunny) |
|-----------|--------------------------------------------------------|----------------|---------|----------------|---------------------------|----------------------|----------------------|
| $P_{max}$ | ( $\mu\text{mol CO}_2 \text{ m}^{-2} \text{ s}^{-1}$ ) | Sunny          | 63.42   | 6.53           | 5.45                      | 5.95                 | 1.09                 |
|           |                                                        | Cloudy         | 68.87   | 1.88           |                           |                      |                      |
| $\alpha$  | ( $\mu\text{mol } \mu\text{mol}^{-1}$ )                | Sunny          | 0.0489  | 0.0074         | 0.0055                    | 0.0068               | 1.11                 |
|           |                                                        | Cloudy         | 0.0544  | 0.0022         |                           |                      |                      |
| $R_d$     | ( $\mu\text{mol CO}_2 \text{ m}^{-2} \text{ s}^{-1}$ ) | Sunny          | 4.75    | 0.32           | 0.08                      | 0.67                 | 1.02                 |
|           |                                                        | Cloudy         | 4.83    | 0.62           |                           |                      |                      |
| $NEE_s$   | ( $\mu\text{mol CO}_2 \text{ m}^{-2} \text{ s}^{-1}$ ) | Sunny          | -16.02  | 1.12           | -2.90*                    | 1.20                 | 1.18                 |
|           |                                                        | Cloudy         | -18.92  | 0.58           |                           |                      |                      |

For each year,  $NEE_s$  was calculated at the same PAR using Eq. (3) and the light response parameters in Table 6. The mean values were obtained for two sky conditions and total standard error was computed using Eq. (4).

The meanings of  $P_{max}$ ,  $\alpha$  and  $R_d$  were the same as Tables 1.

Significance of the difference was "\*" for  $P < 0.05$  if the absolute difference between two sky conditions was greater than the total standard error.

doi:10.1371/journal.pone.0089469.t007

**Citation:** The PLOS ONE Staff (2014) Correction: Biophysical Controls on Light Response of Net CO<sub>2</sub> Exchange in a Winter Wheat Field in the North China Plain. PLoS ONE 9(7): e101733. doi:10.1371/journal.pone.0101733

**Published:** July 3, 2014

**Copyright:** © 2014 The PLOS ONE Staff. This is an open-access article distributed under the terms of the Creative Commons Attribution License, which permits unrestricted use, distribution, and reproduction in any medium, provided the original author and source are credited.

The label of the x-axis is missing in Figure 1. Please see the complete, corrected Figure 1 here.

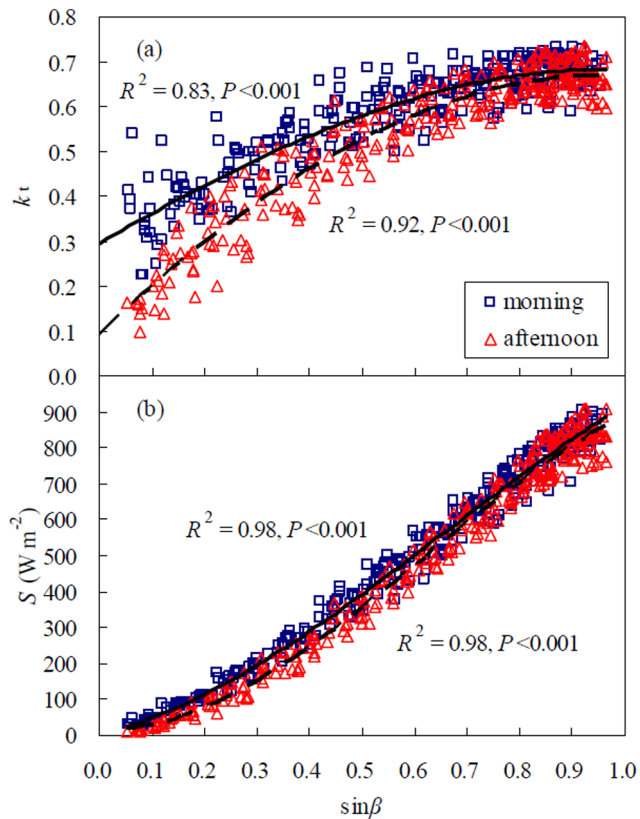

**Figure 1. Scatter plots and regressions between (a) the clarity index ( $k_t$ ) and the sine of solar elevation angles ( $\sin\beta$ ), and (b) global solar radiation ( $S$ ) and  $\sin\beta$  for a winter wheat field in April-May 2003. The data were fitted by cubic polynomials in the morning (solid line) and afternoon (dashed line), respectively.**  
doi:10.1371/journal.pone.0089469.g001

## Reference

1. Tong X, Li J, Yu Q, Lin Z (2014) Biophysical Controls on Light Response of Net  $\text{CO}_2$  Exchange in a Winter Wheat Field in the North China Plain. PLoS ONE 9(2): e89469. doi:10.1371/journal.pone.0089469
